# Supplementary material for: Dynamics of Apis mellifera Filamentous Virus (AmFV) Infections in Honey Bees and Relationships with Other Parasites
Source: MDPI journal article supplement (doi:10.3390/v7052654), 2015-05-22
Supplement: s1 [file s1]

|     |    | DWV |    |     | SBV |    |     | BQCV |    |     | ABPV |    |     | CBPV |    |     | <i>N. ceranae</i> |    |     | <i>Trypanosoma</i> |    |     | AmFV |   |  |  |
|-----|----|-----|----|-----|-----|----|-----|------|----|-----|------|----|-----|------|----|-----|-------------------|----|-----|--------------------|----|-----|------|---|--|--|
|     |    | I   | II | III | I   | II | III | I    | II | III | I    | II | III | I    | II | III | I                 | II | III | I                  | II | III | V    |   |  |  |
| 150 | 1  |     | +  | +   |     |    |     |      | +  |     |      |    |     |      |    |     | +                 |    |     | +                  | +  | +   |      |   |  |  |
|     | 2  | +   | +  | +   |     |    |     |      | +  |     |      |    |     |      |    |     | +                 |    | +   | +                  | +  | +   |      |   |  |  |
|     | 3  |     | +  | +   |     |    |     |      | +  |     |      |    |     |      |    |     |                   |    |     | +                  | +  | +   | +    |   |  |  |
|     | 4  |     | +  | +   |     |    |     | +    | +  |     |      |    |     |      |    |     | +                 |    |     | +                  | +  | +   |      |   |  |  |
|     | 5  |     | +  | n   |     |    | n   |      | +  | n   |      | n  |     | n    |    | +   | n                 |    |     | n                  | +  | +   | n    | + |  |  |
|     | 6  |     | +  | +   |     |    |     | +    | +  |     |      |    |     |      |    |     | +                 |    |     | +                  | +  | +   |      |   |  |  |
|     | 7  | +   | +  | +   |     |    |     | +    | +  |     |      |    |     |      |    |     | +                 |    | +   | +                  | +  | +   |      |   |  |  |
|     | 8  | +   | +  | +   |     |    |     |      | +  |     |      |    |     |      |    |     | +                 |    |     | +                  | +  | +   |      |   |  |  |
|     | 9  |     | +  | +   |     |    |     |      | +  |     |      |    |     |      |    |     |                   |    |     | +                  | +  | +   |      |   |  |  |
|     | 10 |     | +  | +   |     |    |     | +    | +  |     |      |    |     |      |    | +   |                   | +  | +   | +                  | +  | +   | +    |   |  |  |
| 380 | 1  | +   | +  | +   | +   | +  |     | +    | +  |     | +    | +  |     |      |    | +   |                   | +  |     | +                  | +  | +   | n    |   |  |  |
|     | 2  | +   | +  | +   | +   | +  | +   | +    | +  |     | +    |    |     |      |    | +   | +                 | +  |     | +                  | +  | +   | n    |   |  |  |
|     | 3  | +   | +  | +   |     | +  | +   | +    | +  | +   |      |    |     |      |    | +   | +                 | +  |     | +                  | +  | +   | n    |   |  |  |
|     | 4  | +   | +  | +   |     |    | +   | +    | +  |     |      |    |     |      |    | +   |                   | +  |     | +                  | +  | +   | n    |   |  |  |
|     | 5  | +   | +  | +   | +   | +  |     | +    |    |     | +    |    |     |      |    |     | +                 | +  |     | +                  | +  | +   | n    |   |  |  |
|     | 6  | +   | +  | +   | +   |    |     | +    | +  |     | +    |    |     |      |    | +   | +                 | +  |     | +                  | +  | +   | n    |   |  |  |
|     | 7  | +   | +  | +   | +   | +  | +   | +    |    | +   | +    |    |     |      |    | +   | +                 | +  |     | +                  | +  | +   | n    |   |  |  |
|     | 8  | +   | +  | +   |     |    |     |      | +  |     | +    |    |     |      |    | +   |                   |    |     | +                  | +  | +   | n    |   |  |  |
|     | 9  | +   | +  | +   |     | +  |     | +    | +  | +   |      |    |     |      |    | +   | +                 | +  |     | +                  | +  | +   | n    |   |  |  |
|     | 10 | +   | +  | +   | +   |    |     | +    | +  |     | +    |    |     |      |    | +   | +                 | +  |     | +                  | +  | +   | n    |   |  |  |
| 426 | 1  |     | +  |     |     |    |     |      |    |     |      |    |     |      |    | +   | +                 | +  | +   | +                  | +  | +   | n    |   |  |  |
|     | 2  |     |    |     |     |    |     |      |    |     |      |    |     |      |    | +   |                   | +  | +   | +                  | +  | +   |      |   |  |  |
|     | 3  |     | +  | +   |     |    |     |      |    |     |      |    | +   |      |    |     | +                 | +  |     | +                  | +  | +   |      |   |  |  |
|     | 4  |     | +  | +   |     |    |     |      |    |     |      |    | +   |      |    |     | +                 | +  | +   | +                  | +  | +   |      |   |  |  |
|     | 5  | +   |    |     |     |    |     | +    |    |     |      |    |     |      |    | +   |                   | +  |     | +                  | +  | +   |      |   |  |  |
|     | 6  | +   |    | +   |     |    |     |      |    |     |      |    |     |      |    | +   | +                 | +  |     | +                  | +  | +   |      |   |  |  |
|     | 7  | +   |    | +   |     |    |     | +    |    |     |      |    |     |      |    | +   | +                 | +  |     | +                  | +  | +   |      |   |  |  |
|     | 8  |     | +  | +   |     |    |     |      |    |     |      |    |     |      |    | +   |                   | +  |     | +                  | +  | +   |      |   |  |  |
|     | 9  | +   | +  | +   |     |    |     | +    |    |     |      |    |     |      |    |     | +                 | +  |     | +                  | +  | +   |      |   |  |  |
|     | 10 | +   | +  | +   |     |    |     | +    | +  |     |      | +  |     |      |    |     | +                 | +  |     | +                  | +  | +   |      |   |  |  |
| 624 | 1  | +   | +  | +   | +   | +  |     |      | +  |     | +    |    |     |      |    | +   | +                 | +  | +   | +                  | +  | +   | n    |   |  |  |
|     | 2  | +   | +  | +   | +   |    |     |      |    | +   |      |    |     |      |    |     | +                 |    | +   | +                  | +  | +   | n    |   |  |  |
|     | 3  | +   | +  | +   | +   | +  |     | +    | +  | +   |      |    |     |      | +  | +   |                   | +  |     | +                  | +  | +   | n    |   |  |  |
|     | 4  | +   | +  | +   |     | +  |     |      | +  |     |      | +  |     |      |    |     |                   | +  | +   | +                  | +  | +   | n    |   |  |  |
|     | 5  | +   | +  | +   |     | +  |     | +    | +  |     | +    |    |     |      | +  |     | +                 |    | +   | +                  | +  | +   | n    |   |  |  |
|     | 6  | +   | +  | +   | +   | +  |     | +    | +  |     | +    |    |     |      |    | +   | +                 |    | +   | +                  | +  | +   | n    |   |  |  |
|     | 7  | +   | +  | +   |     | +  |     | +    |    | +   |      |    |     |      | +  |     |                   | +  |     | +                  | +  | +   | n    |   |  |  |
|     | 8  | +   | +  | +   | +   | +  |     | +    | +  |     |      |    |     |      |    | +   |                   |    | +   | +                  | +  | +   | n    |   |  |  |
|     | 9  | +   | +  | +   | +   | +  |     | +    |    |     |      |    |     |      | +  |     | +                 | +  | +   | +                  | +  | +   | n    |   |  |  |
|     | 10 | +   | +  | +   | +   | +  |     | +    | +  |     |      |    |     |      | +  | +   |                   |    | +   | +                  | +  | +   | n    |   |  |  |
| 878 | 1  | +   | +  | +   | +   | +  | +   | +    |    |     |      |    |     |      | +  | +   | +                 | +  | +   | +                  | +  |     |      |   |  |  |

|     |    |    |    |    |    |    |    |    |    |    |   |   |   |   |   |   |    |    |    |    |    |    |     |     |     |    |
|-----|----|----|----|----|----|----|----|----|----|----|---|---|---|---|---|---|----|----|----|----|----|----|-----|-----|-----|----|
|     | 2  | +  | +  | +  | +  | +  |    | +  |    |    |   |   |   |   |   | + | +  | +  | +  | +  | +  | +  | +   |     |     |    |
|     | 3  | +  | +  | +  | +  |    |    | +  | +  |    |   |   |   |   |   | + | +  | +  | +  | +  | +  |    |     |     |     |    |
|     | 4  | +  | +  | +  | +  | +  |    | +  | +  |    |   |   |   |   |   | + | +  | +  | +  | +  | +  |    |     |     |     |    |
|     | 5  | +  | +  | +  | +  | +  |    | +  | +  |    |   |   |   |   |   |   |    |    |    | +  | +  | +  |     |     |     |    |
|     | 6  | +  | +  | +  | +  | +  |    |    |    | +  |   |   |   |   |   | + | +  |    |    | +  | +  | +  |     |     |     |    |
|     | 7  | +  | +  | +  | +  | +  | +  | +  | +  |    |   |   |   |   |   |   | +  | +  |    | +  | +  | +  |     |     |     |    |
|     | 8  | +  | +  | +  | +  |    |    | +  | +  |    |   |   |   |   |   |   | +  |    |    | +  | +  | +  |     |     |     |    |
|     | 9  | +  | +  | +  | +  | +  |    | +  | +  |    |   |   |   |   |   |   | +  |    |    | +  | +  | +  |     |     |     |    |
|     | 10 | +  | +  | +  | +  | +  | +  |    |    |    |   |   |   |   |   |   | +  | +  | +  |    |    | +  |     |     |     |    |
| (%) |    | 76 | 92 | 94 | 46 | 48 | 14 | 62 | 66 | 24 | 6 | 9 | 0 | 2 | 0 | 6 | 44 | 40 | 51 | 54 | 66 | 56 | 100 | 100 | 100 | 10 |
