# Supplementary material for: Dynamics of Apis mellifera Filamentous Virus (AmFV) Infections in Honey Bees and Relationships with Other Parasites
Source: MDPI journal article supplement (doi:10.3390/v7052654), 2015-05-22
Supplement: s1 [file s1]

## SUPPLEMENTARY FILE / Table 1.

|                  | Target              | primers                                 | sequence (5' - 3')                                     | size (bp) | Molarity | E    | Tm (°C)  | References       |
|------------------|---------------------|-----------------------------------------|--------------------------------------------------------|-----------|----------|------|----------|------------------|
| Qualitative PCR  | <i>AmFV</i>         | AmFV-F<br>AmFV-R                        | CAGAGAATTCGGTTTTTTGTGAGTG<br>CATGGTGGCCAAGTCTTGCT      | 551       | 0.4 µM   | n.a. | 56       | [1]              |
|                  | <i>N. ceranae</i>   | Ncer-F<br>Ncer-R                        | CGGATAAAAGAGTCCGTTACC<br>TGAGCAGGGTTCTAGGGAT           | 250       | 0.4 µM   | n.a. | 56       | [2]              |
|                  | <i>N. apis</i>      | Napis-F<br>Napis-R                      | CCATTGCCGGATAAGAGAGT<br>CCACCAAAAACCTCCAAGAG           | 269       | 0.4 µM   | n.a. | 56       | [2]              |
|                  | <i>C. mellifica</i> | TryB-R106<br>TryA-R40                   | GTTGACGGAATCAACCAAAACAAAT<br>GCGTCAGAGGTGAAATTCTTAGACC | 715       | 0.4 µM   | n.a. | 56       | [3]              |
|                  | Target              | primers                                 | sequence (5' - 3')                                     | size (bp) | Molarity | E    | Tm* (°C) | References       |
| Quantitative PCR | <i>AmFV</i>         | AmFV2-F<br>AmFV2-R                      | ACCCAACCTTTTGCGAAGCGTT<br>ATGGGGCGTCTCGGGTAACCA        | 97        | 0.3 µM   | 1.93 | 77.6     | This publication |
|                  | <i>N. ceranae</i>   | qNcer-F<br>qNcer-R                      | AAGAGTGAGACCTATCAGCTAGTTG<br>ATCTCTCATCCAAGAGCATTGC    | 104       | 0.3 µM   | 1.90 | 76.7     | [4]              |
|                  | <i>β-Actin mRNA</i> | A.m. β-Actin-q92F<br>A.m. β-Actin-q157R | CGTTGTCCCGAGGCTCTTT<br>TGTCTCATGAATACCGCAAGCT          | 66        | 0.4 µM   | 1.97 | 79.6     | [5]              |

\*Tm of the PCR amplicon calculated from the dissociation curve

## References:

- Gauthier, L.; Cornman, S.; Hartmann, H.; Cousserans, F.; Evans, J.D.; de Miranda, J.R.; Neumann, P. The *Apis mellifera* filamentous virus genome; submitted.
- Chen, Y.P.; Evans, J.D.; Murphy, C.; Gutell, R.; Zuker, M.; Gundensen-Rindal, D.; Pettis, J.S. Morphological, molecular, and phylogenetic characterization of *Nosema ceranae*, a microsporidian parasite isolated from the European honey bee, *Apis mellifera*. *J Eukaryot Microbiol.* **2009**, 56(2):142-7.
- Cox-Foster, D.L.; Conlan, S.; Holmes, E.C.; Palacios, G.; Evans, J.D.; Moran, N.A.; Quan, P.L.; Briese, T.; Hornig, M.; Geiser, D.M.; Martinson, V.; VanEngelsdorp, D.; Kalkstein, A.L.; Drysdale, A.; Hui, J.; Zhai, J.H.; Cui, L.W.; Hutchison, S.K.; Simons, J.F.; Egholm, M.; Pettis, J.S.; Lipkin, W.I. A metagenomic survey of microbes in honey bee colony collapse disorder. *Science* 2007, 318, 283-287.
- Bourgeois, A.L.; Rinderer, T.E.; Beaman, L.D.; Danka, R.G. Genetic detection and quantification of *Nosema apis* and *N. ceranae* in the honey bee, *J. Invertebr. Pathol* 2010, 103, 53-58.
- Gauthier, L.; Ravallec, M.; Tournaire, M.; Cousserans, F.; Bergoin, M.; Dainat, B.; de Miranda, J.R. Viruses associated with ovarian degeneration in *Apis mellifera* L. queens. *PLoS One.* 2011 Jan 25;6(1):
