# Supplementary figures and images for: Dynamics of Apis mellifera Filamentous Virus (AmFV) Infections in Honey Bees and Relationships with Other Parasites
Source: MDPI journal article supplement (doi:10.3390/v7052654), 2015-05-22

**Spring**

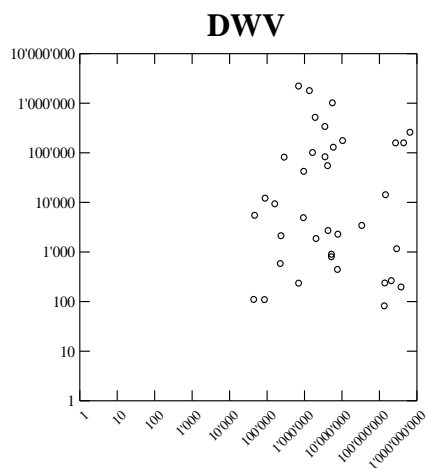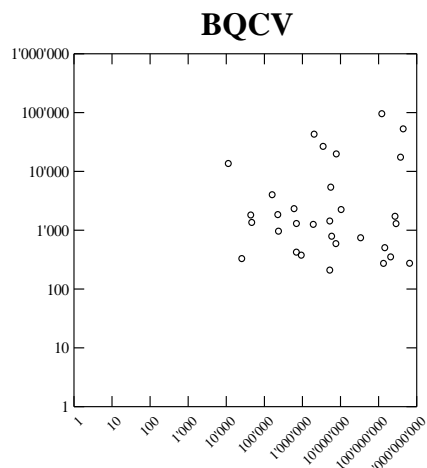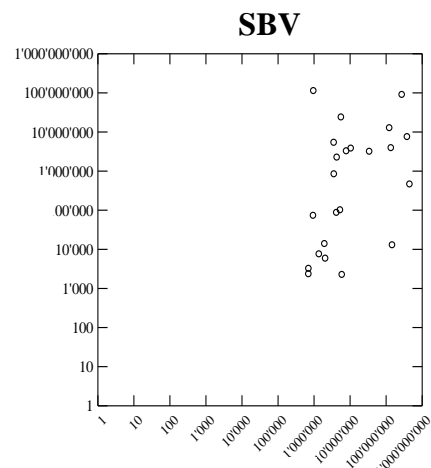

**Summer**

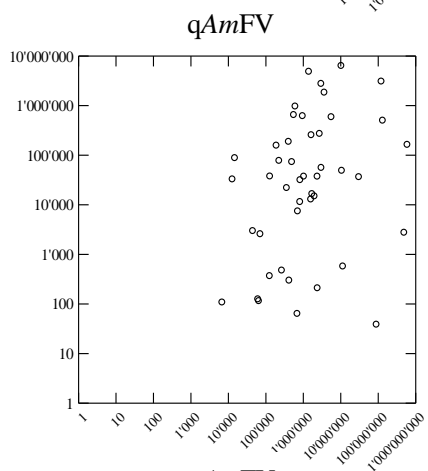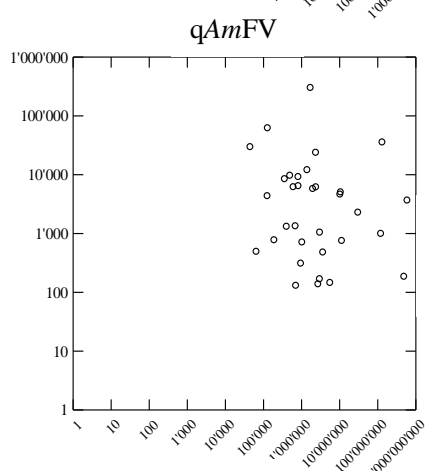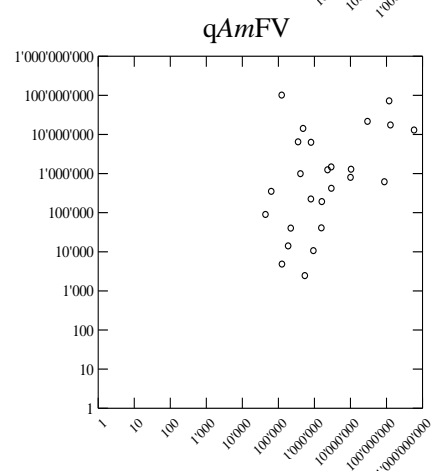

**Fall**

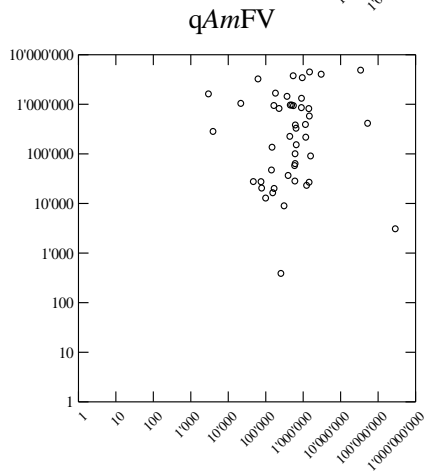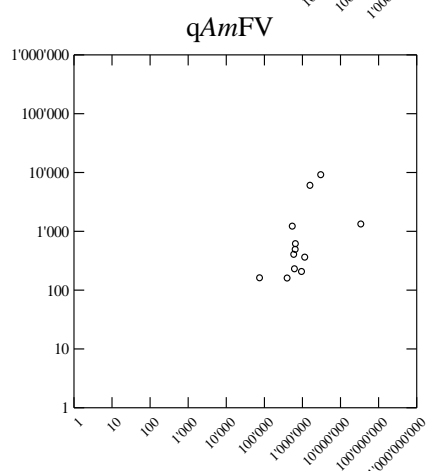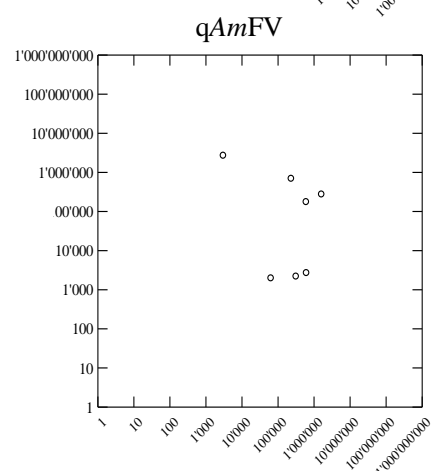

Supplement: s1 [file s1]
